# Supplementary material for: Enhancing powdery mildew resistance in soybean by targeted mutation of MLO genes using the CRISPR/Cas9 system
Source: PubMed Central journal article supplement (PMC10623788; doi:10.1186/s12870-023-04549-5), 2023-11-03
Supplement: 12870_2023_4549_MOESM1_ESM.pdf [file 12870_2023_4549_MOESM1_ESM.pdf]

1 **Additional file 1**

2 **Enhancing powdery mildew resistance in soybean by targeted**  
3 **mutation of *MLO* genes using CRISPR/Cas9 system**

4  
5 Thao Phuong Bui<sup>1,2</sup>, Huy Le<sup>1,†</sup>, Dong Thi Ta<sup>1</sup>, Cuong Xuan Nguyen<sup>1,3</sup>, Ngoc Thu Le<sup>1</sup>, Truong  
6 Thi Tran<sup>4</sup>, Phuong Van Nguyen<sup>2</sup>, Gary Stacey<sup>3</sup>, Minviluz G. Stacey<sup>3</sup>, Ngoc Bich Pham<sup>1,5</sup>, Ha  
7 Hoang Chu<sup>1,5</sup> and Phat Tien Do<sup>1,5\*</sup>

8  
9 <sup>1</sup>Institute of Biotechnology, Vietnam Academy of Science and Technology, Hanoi, Vietnam

10 <sup>2</sup>University of Science and Technology of Hanoi, Vietnam Academy of Science and Technology,  
11 Hanoi, Vietnam

12 <sup>3</sup>Division of Plant Sciences, University of Missouri, Columbia, MO 65211, USA

13 <sup>4</sup>Legumes Research and Development Center, Vietnam Academy of Agriculture Science, Hanoi,  
14 Vietnam

15 <sup>5</sup>Graduate University of Science and Technology, Vietnam Academy of Science and Technology,  
16 Hanoi, Vietnam

17 <sup>†</sup>Current address: Department of Biology, Washington University in St. Louis, St. Louis, USA

18  
19 \* Correspondence: [dtphat@ibt.ac.vn](mailto:dtphat@ibt.ac.vn)

20

21

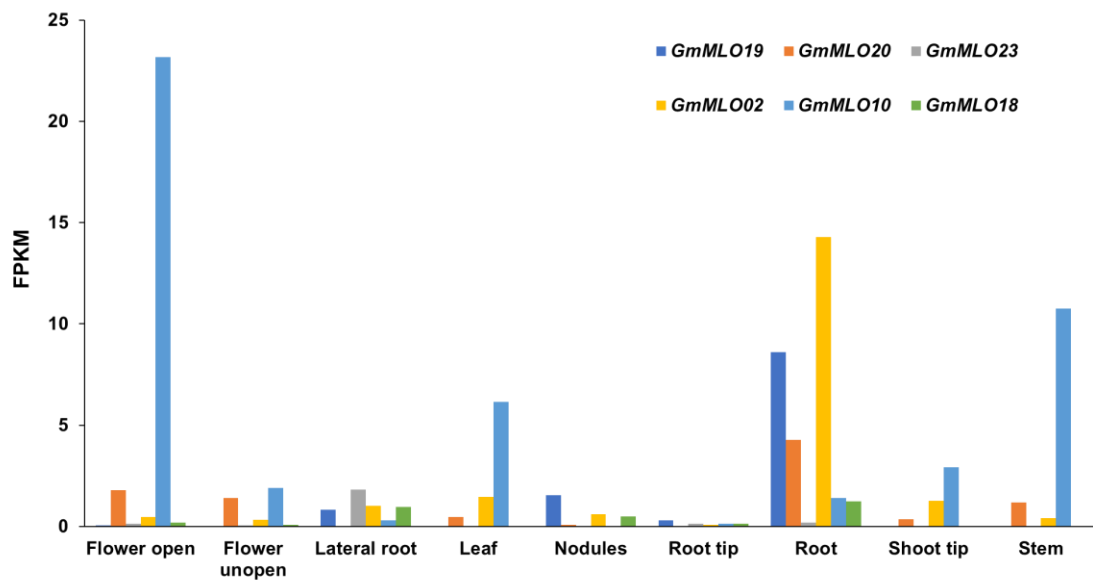

22

23 **Fig. S1** Transcriptomics analysis of *GmMLO* genes in different tissues of soybean plant. Data  
 24 were obtained from RNA-Seq Atlas of *Glycine max*

25

26

27

28

29

30

31

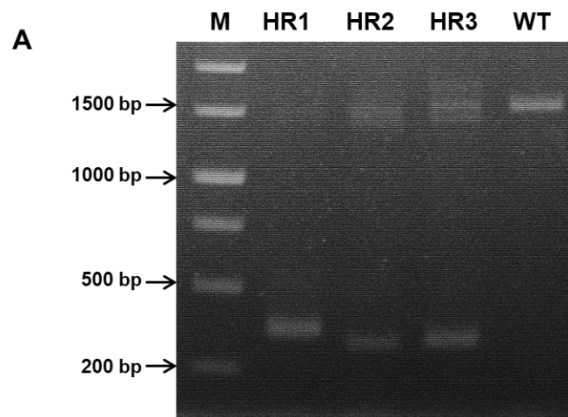

**B**

|              | Target 1                                   | 1200bp | Target 2                          | Δ        | Clones |
|--------------|--------------------------------------------|--------|-----------------------------------|----------|--------|
| GmMLO20 - WT | GATCCTGAGAGGTTCAAGTTTGCTA <b>GGG</b> ATACA |        | TCAAGGGTGCACCTGTGGTTGAGCCAGGAGATG |          |        |
| HR1          | GATCCTGAGAGGTT <b>CAGG</b> .....           | -----  | .....CCAGGAGATG                   | -1241 bp | 4/4    |

32

33 **Fig. S2** Induced mutation analysis of hairy roots. **A** Gel electrophoresis (agarose 1%) of  
 34 *GmMLO20* edited region in wild-type (WT) and hairy root samples (HR1, HR2, HR3) with large  
 35 deletions. M: 1 kb DNA marker. Shifted bands in lines HR1, HR2 and HR3 indicated the induced  
 36 mutations of targeted genes. **B** Sequencing result of the HR1 line for the edited regions of  
 37 *GmMLO20* compared to wild-type allele. Target sequences and PAMs are indicated in red and  
 38 blue, respectively. Δ indicates targeted sequence changes: - for deletion. Clones indicate number  
 39 of colonies with the respective alleles out of total of clones sequenced

40

41

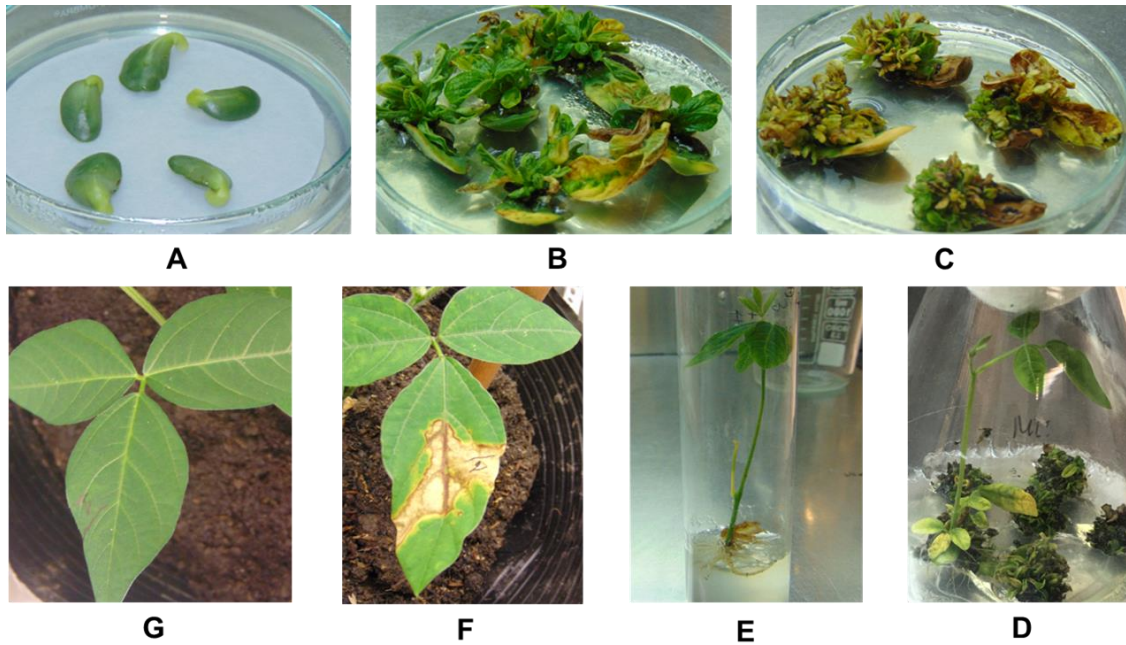

42

43 **Fig. S3** Soybean transformation procedure. **A** Cotyledons at 5 days on the co-cultivation medium.

44 **B, C** Shoot induction at 14 and 28 days on the selection medium. **D** Shoot elongation. **E** Rooted

45 plants on the rooting medium. **F, G** Leaf painting using 200 mg/L glufosinate

46

47

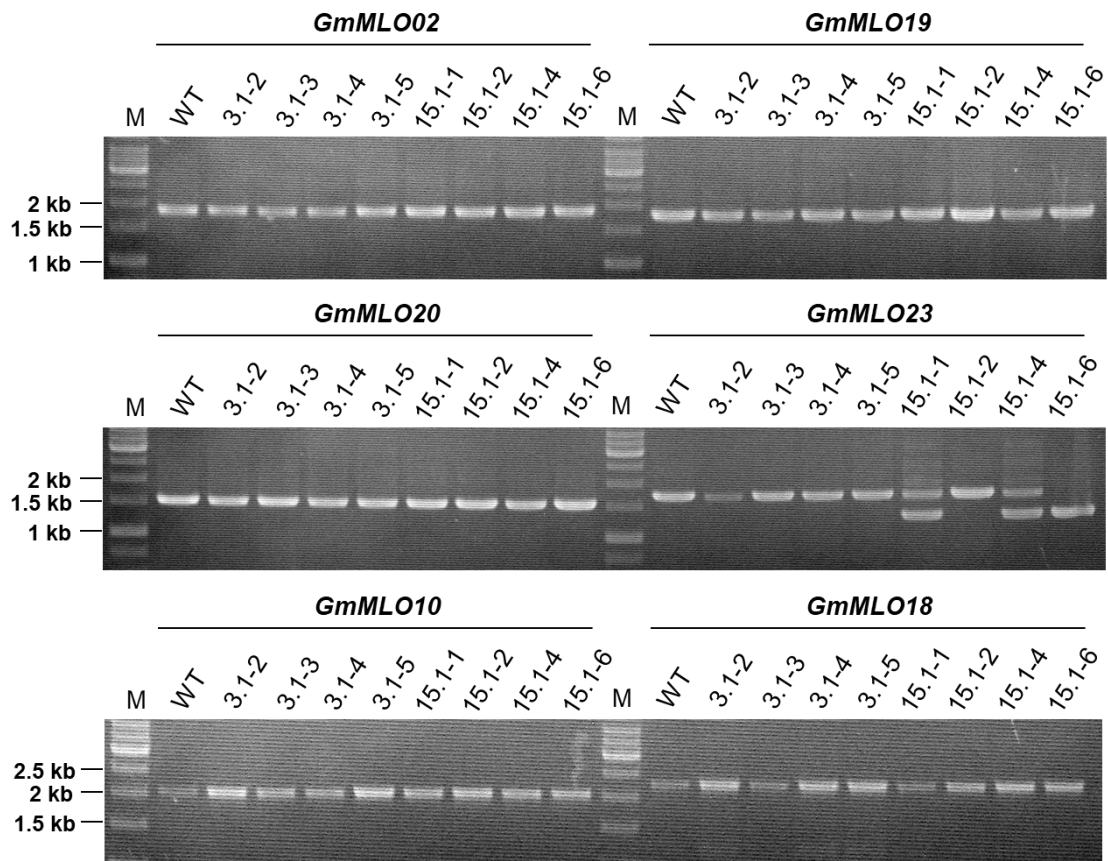

48

49 **Fig. S4** Gel electrophoresis of PCR-amplicons of *GmMLO* target expanding regions at T1  
 50 generation. WT: Non transgenic wild-type plant; 3.1-2 to 3.1-5: T1 plants from 3.1 line; 15.1-1  
 51 to 15.1-6: T1 plants from 15.1 line; M: 1 kb DNA ladder. PCR products amplified by specific  
 52 primers for extended regions of *GmMLO02*, *GmMLO10*, *GmMLO18*, *GmMLO19*, *GmMLO20*  
 53 and *GmMLO23* genes

54

55

| <b>A <i>GmMLO02</i></b> |                                                                   | ( Target 1 ) | 1294bp                                                 | ( Target 2 ) | Δ    | Genotype |
|-------------------------|-------------------------------------------------------------------|--------------|--------------------------------------------------------|--------------|------|----------|
| MLO02-WT                | ACATATTGCAGATCCTGAGAGGTT <b>CAGGTTT</b> GCAAGGGACACAA             | .....        | TGTCAAAGG <b>GGTGCACCTGTGGTTGTGCCAGG</b> TGATGATCTG    |              |      |          |
| 3.1-3-4                 | ACATATTGCAGATCCT--GAGGTT <b>CAGGTTT</b> GCAAGGGACACAA             | .....        | TGTCAAAGG <b>GGTGCACCTGTGGTTGTGCCAGG</b> TGATGATCTG    | -2/0         | Homo |          |
| 3.1-3-41                | ACATATTGCAGATCCT--GAGGTT <b>CAGGTTT</b> GCAAGGGACACAA             | .....        | TGTCAAAGG <b>GGTGCACCTGTGGTTGTGCCAGG</b> TGATGATCTG    | -2/0         | Homo |          |
| 3.1-5-4                 | ACATATTGCAGATCCT--GAGGTT <b>CAGGTTT</b> GCAAGGGACACAA             | .....        | TGTCAAAGG <b>GGTGCACCTGTGGTTGTGCCAGG</b> TGATGATCTG    | -2/0         | Homo |          |
| 3.1-5-6                 | ACATATTGCAGATCCT--GAGGTT <b>CAGGTTT</b> GCAAGGGACACAA             | .....        | TGTCAAAGG <b>GGTGCACCTGTGGTTGTGCCAGG</b> TGATGATCTG    | -2/0         | Homo |          |
| 3.1-5-44                | ACATATTGCAGATCCT--GAGGTT <b>CAGGTTT</b> GCAAGGGACACAA             | .....        | TGTCAAAGG <b>GGTGCACCTGTGGTTGTGCCAGG</b> TGATGATCTG    | -2/0         | Homo |          |
| 15.1-2-2                | ACATATTGCAGATCCTG-----AGGTT <b>TGCAAGGG</b> ACACAA                | .....        | TGTCAAAGG <b>GGTGCACCTGTGGTTGTGCCAGG</b> TGATGATCTG    | -8/0         | Homo |          |
| 15.1-6-4                | GCAGATCCTGAGATATATATCA <b>AGGTT</b> CAGGTTT <b>GCAAGGG</b> ACACAA | 1294bp       | TGTCAAAGG <b>GGTGCACCTGTGGTTGTGCCAGG</b> TGATGAT       | +11/0        | Homo |          |
| <b>B <i>GmMLO19</i></b> |                                                                   | ( Target 1 ) | 1304bp                                                 | ( Target 2 ) | Δ    | Genotype |
| MLO19-WT                | CATATTACAGATCCTGAGAGGTT <b>CAGGTTT</b> GCAAGGGACACAA              | .....        | GTTGTCAAAGG <b>GGTGCACCTGTGGTTGAGCCAGG</b> CGATGATCTG  |              |      |          |
| 3.1-3-4                 | CATATTACAGATCCTGAG-----AGGTT <b>TGCAAGGG</b> ACACAA               | .....        | GTTGTCAAAGG <b>GGTGCACCTGTGGTTGA--CAGG</b> CGATGATCTG  | -6/-2        | Homo |          |
| 3.1-3-41                | CATATTACAGATCCTGAG-----AGGTT <b>TGCAAGGG</b> ACACAA               | .....        | GTTGTCAAAGG <b>GGTGCACCTGTGGTTGA--CAGG</b> CGATGATCTG  | -6/-2        | Homo |          |
| 3.1-5-4                 | CATATTACAGATCCTGAG-----AGGTT <b>TGCAAGGG</b> ACACAA               | .....        | GTTGTCAAAGG <b>GGTGCACCTGTGGTTGA--CAGG</b> CGATGATCTG  | -6/-2        | Homo |          |
| 3.1-5-6                 | CATATTACAGATCCTGAG-----AGGTT <b>TGCAAGGG</b> ACACAA               | .....        | GTTGTCAAAGG <b>GGTGCACCTGTGGTTGA--CAGG</b> CGATGATCTG  | -6/-2        | Homo |          |
| 3.1-5-44                | CATATTACAGATCCTGAG-----AGGTT <b>TGCAAGGG</b> ACACAA               | .....        | GTTGTCAAAGG <b>GGTGCACCTGTGGTTGA--CAGG</b> CGATGATCTG  | -6/-2        | Homo |          |
| 15.1-2-2                | CATATTACAGATCCT--GAGGTT <b>CAGGTTT</b> GCAAGGGACACAA              | .....        | GTTGTCAAAGG <b>GGTGCACCTGTGGTTG--GCCAGG</b> CGATGATCTG | -2/-1        | Homo |          |
| 15.1-6-4                | CATATTACAGATCCT--GAGGTT <b>CAGGTTT</b> GCAAGGGACACAA              | .....        | GTTGTCAAAGG <b>GGTGCACCTGTGGTTG--GCCAGG</b> CGATGATCTG | -2/-1        | Homo |          |
| <b>C <i>GmMLO20</i></b> |                                                                   | ( Target 1 ) | 1196bp                                                 | ( Target 2 ) | Δ    | Genotype |
| MLO20-WT                | CATTGCAGATCCTGAGAGGTT <b>CAGGTTT</b> GCTAGGGATACAA                | .....        | GTCGTCAAGG <b>GGTGCACCTGTGGTTGAGCCAGG</b> AGATGGATTG   |              |      |          |
| 3.1-3-4                 | CATTGCAGATCCTGAGAGGTT <b>CAGGTTT</b> GCTAGGGATACAA                | .....        | GTCGTCAAGG <b>GGTGCACCT-----GCCAGG</b> AGATGGATTG      | 0/-8         | Homo |          |
| 3.1-3-41                | CATTGCAGATCCTGAGAGGTT <b>CAGGTTT</b> GCTAGGGATACAA                | .....        | GTCGTCAAGG <b>GGTGCACCT-----GCCAGG</b> AGATGGATTG      | 0/-8         | Homo |          |
| 3.1-5-4                 | CATTGCAGATCCTGAGAGGTT <b>CAGGTTT</b> GCTAGGGATACAA                | .....        | GTCGTCAAGG <b>GGTGCACCTGTGGTT--GCCAGG</b> AGATGGATTG   | 0/-2         | Homo |          |
| 3.1-5-6                 | CATTGCAGATCCTGAGAGGTT <b>CAGGTTT</b> GCTAGGGATACAA                | .....        | GTCGTCAAGG <b>GGTGCACCT-----GCCAGG</b> AGATGGATTG      | 0/-8         | Homo |          |
| 3.1-5-44                | CATTGCAGATCCTGAGAGGTT <b>CAGGTTT</b> GCTAGGGATACAA                | .....        | GTCGTCAAGG <b>GGTGCACCTGTGGTT--GCCAGG</b> AGATGGATTG   | 0/-2         | Homo |          |
| 15.1-2-2                | CATTGCAGATCCTGAGAGGTT <b>CAGGTTT</b> GCTAGGGATACAA                | .....        | GTCGTCAAGG <b>GGTGCACCTGTGGTTGAGCCAGG</b> AGATGGATTG   | 0/0          | WT   |          |
| 15.1-6-4                | CATTGCAGATCCTGAGAGGTT <b>CAGGTTT</b> GCTAGGGATACAA                | .....        | GTCGTCAAGG <b>GGTGCACCTGTGGTTGAGCCAGG</b> AGATGGATTG   | 0/0          | WT   |          |
| <b>D <i>GmMLO23</i></b> |                                                                   | ( Target 1 ) | 1353bp                                                 | ( Target 2 ) | Δ    | Genotype |
| MLO23-WT                | CAGGCTTGCATATCCTGAGAGGTT <b>CAGGCTT</b> GCAAGGACACAA              | .....        | ATTCAAGG <b>GGTGCACCTGTGGTTGAGCCAGG</b> AGATGACCTG     |              |      |          |
| 3.1-3-4                 | CAGGCTTGCATATCCTGAGAGGTT <b>CAGGCTT</b> GCAAGGACACAA              | .....        | ATTCAAGG <b>GGTGCACCTGTGGTTGA--CCAGG</b> AGATGACCTG    | 0/-1         | Homo |          |
| 3.1-3-41                | CAGGCTTGCATATCCTGAGAGGTT <b>CAGGCTT</b> GCAAGGACACAA              | .....        | ATTCAAGG <b>GGTGCACCTGTGGTTGA--CCAGG</b> AGATGACCTG    | 0/-1         | Homo |          |
| 3.1-5-4                 | CAGGCTTGCATATCCTGAGAGGTT <b>CAGGCTT</b> GCAAGGACACAA              | .....        | ATTCAAGG <b>GGTGCACCTGTGGTTGA--CCAGG</b> AGATGACCTG    | 0/-1         | Homo |          |
| 3.1-5-6                 | CAGGCTTGCATATCCTGAGAGGTT <b>CAGGCTT</b> GCAAGGACACAA              | .....        | ATTCAAGG <b>GGTGCACCTGTGGTTGA--CCAGG</b> AGATGACCTG    | 0/-1         | Homo |          |
| 3.1-5-44                | CAGGCTTGCATATCCTGAGAGGTT <b>CAGGCTT</b> GCAAGGACACAA              | .....        | ATTCAAGG <b>GGTGCACCTGTGGTTGA--CCAGG</b> AGATGACCTG    | 0/-1         | Homo |          |
| 15.1-2-2                | CAGGCTTGCATATCCTGAGAGGTT <b>CAGGCTT</b> GCAAGGACACAA              | .....        | ATTCAAGG <b>GGTGCACCTGTGGTT--GCCAG</b> NAGATGACCTG     | 0/-2         | Homo |          |
| 15.1-6-4                | CAGGCTTGCATATCCTGAGAGGTT <b>CAGGCTT</b> GCAAGGACACAA              | 967bp        | TAACAGA-----CAACCGTCCACGC                              | 0/-428       | Homo |          |

56

57 **Fig. S5** Inheritance of induced mutations in *GmMLO02* (A), *GmMLO19* (B), *GmMLO20* (C) and  
58 *GmMLO23* (D) genes in T2 plants. Target sequences and PAMs are indicated in red and blue  
59 color, respectively. Inserted nucleotides are shown in yellow. Δ indicates targeted sequence  
60 changes: 0 for no change, - for deletion, + for insertion

61

62

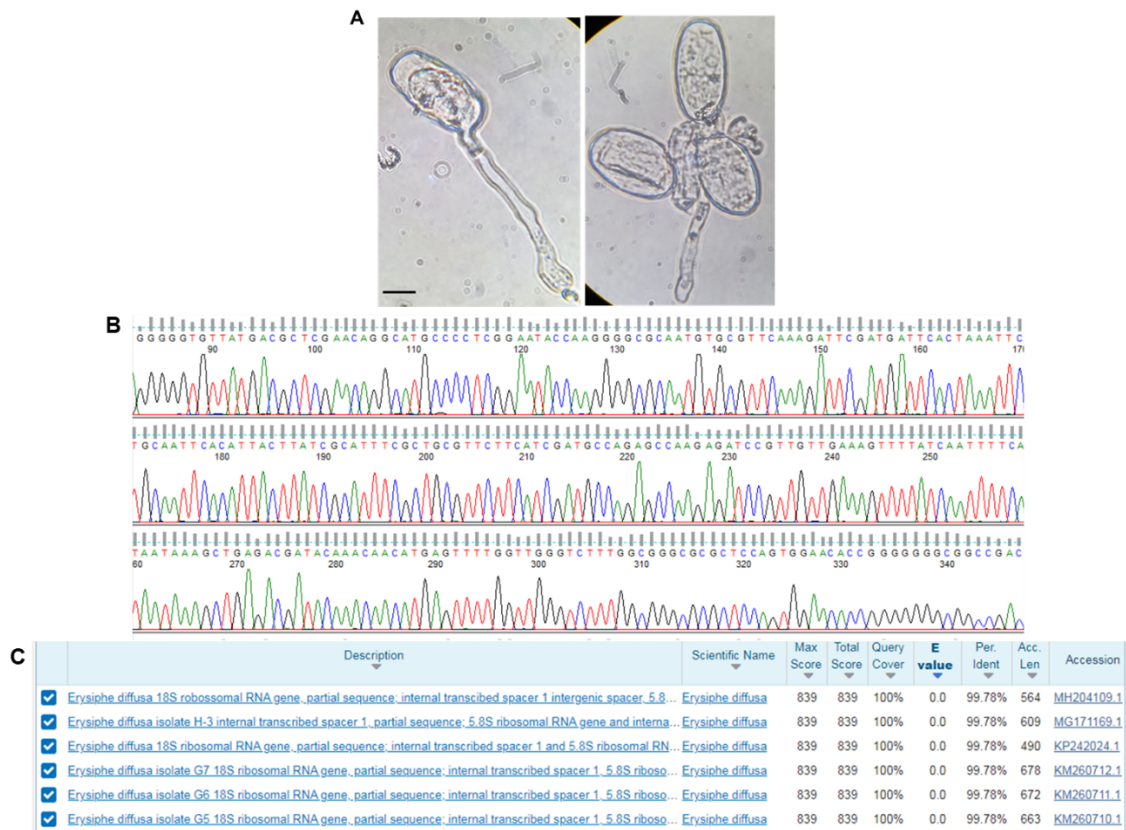

63

64 **Fig. S6** *E. diffusa* isolation and characterization. **A** Conidiophore and conidia of *E. diffusa*

65 isolated from infected leaves. Scale bar = 10  $\mu$ m. **B** Internal transcribed spacer (ITS) sequences

66 of the collected *E. diffusa*. **C** Nucleotide BLAST result of the *E. diffusa* ITS sequence on

67 GenBank, NCBI

68

69

70

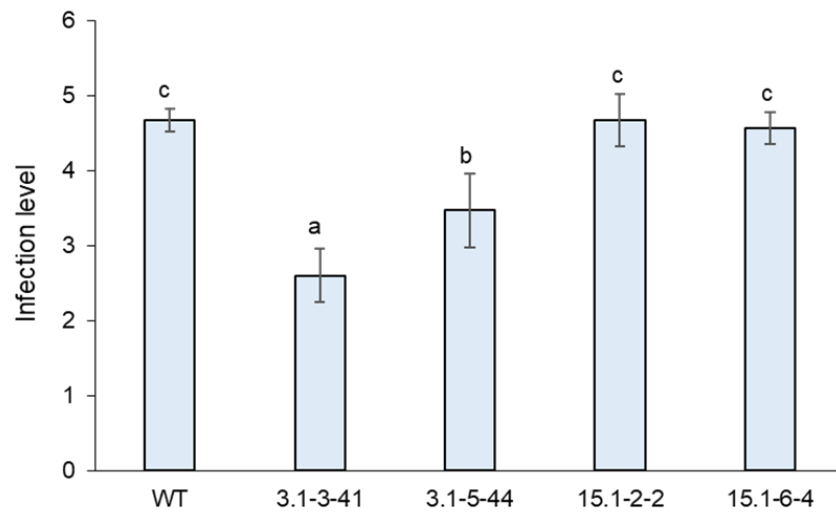

71

72 **Fig. S7** Powdery mildew resistant assessment of T2 offspring *Gmml0* mutant lines under the net-  
 73 house conditions. Infection levels were recorded using a 0 to 5 scale (described by Tran et al.,  
 74 2015), which according to strong resistance to severe infection. Infection levels were calculated  
 75 as the average of 20-30 biological replicates and three experiments. Statistical analysis was done  
 76 using one-way ANOVA followed by a *post hoc* Turkey's test. Significant difference was  
 77 considered at  $P < 0.05$

78

79

80

81

82

83

84



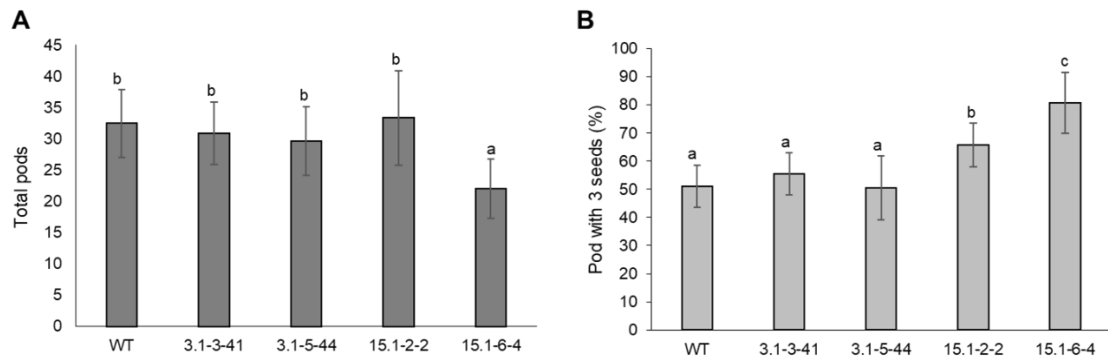

85

86 **Fig. S8** Soybean seed production under the net-house conditions. **A** The total number of pods per

87 plant. **B** The frequency of pods with 3 seeds. WT: Control line (DT26 cultivar); 3.1-3-41, 3.1-5-

88 44, 15.1-2-2, 15.1-6-4: T2 offspring *Gmml0* soybean mutant lines. Error bars indicate standard

89 deviations, n = 9-14. Statistical analysis was done using one-way ANOVA followed by a *post*

90 *hoc* Turkey's test. Significant difference was considered at  $P < 0.05$

91

92

93

94

95

96

97

98

99

100

101

102

103

104

105

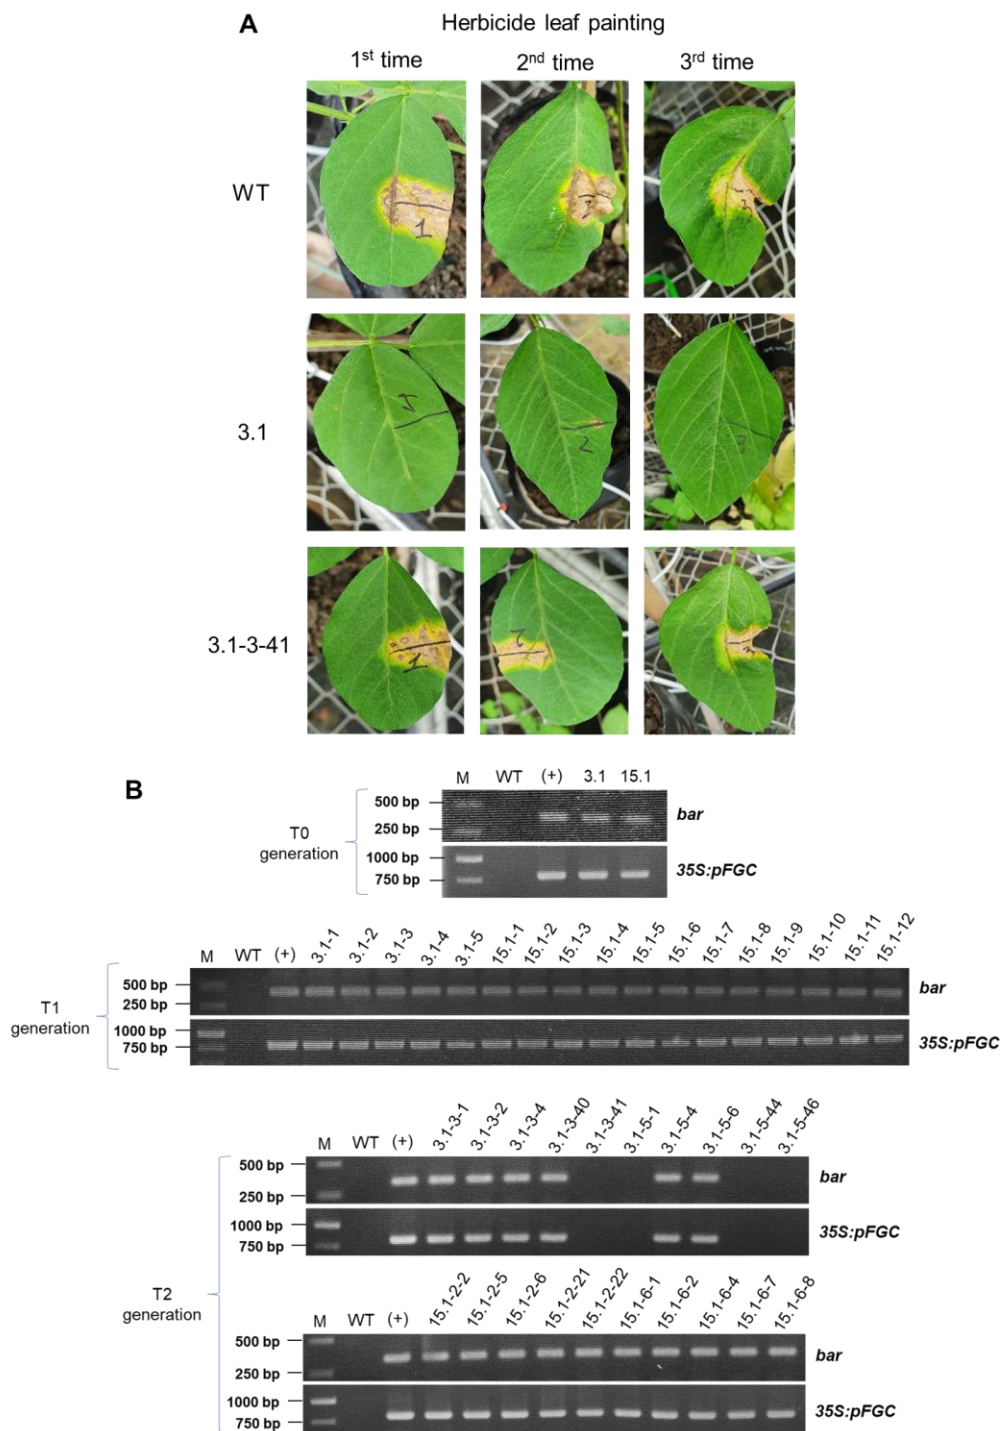

106

107 **Fig. S9** Transgene inheritance and segregation at different generations. **A** Representative results  
 108 of herbicide leaf painting with glufosinate solution (200 mg/L) on wild-type (WT), herbicide  
 109 resistant line (3.1) and herbicide susceptible line (3.1-3-41). **B** Gel electrophoresis of PCR  
 110 amplicons of transgenes at T0, T1 and T2 generations. M: 1 kb DNA ladder; WT: non transgenic

111 wild-type plant; (+): positive control (CRISPR/Cas9 vector); *bar*: herbicide resistance gene;  
112 35S:pFGC: transgene region spanning pFGC vector and 35SPPDK promoter of pcoCas9.

113

114

115

116

117

118

119

120

121

122

123

124

125

126

127

128

129

130

131

132

133

134

135

136

137 **Table S1** Sequences of oligonucleotides and primer sets used in this study

| Oligonucleotides and primers | 5'-3' sequence                    | Description                                                                    |
|------------------------------|-----------------------------------|--------------------------------------------------------------------------------|
| MLO-gRNA1-F                  | <b>gttt</b> TGAGAGGTTTCAGGTTTGCAA | Annealed to create gRNA for target 1                                           |
| MLO-gRNA1-R                  | <b>aatc</b> TTGCAAACCTGAACCTCTCA  |                                                                                |
| MLO-gRNA2-F                  | <b>gttt</b> GGTGCACCTGTGGTTGAGCC  | Annealed to create gRNA for target 2                                           |
| MLO-gRNA2-R                  | <b>aatc</b> GGCTCAACCACAGGTGCACC  |                                                                                |
| bar-F                        | TACCATGAGCCCAGAACGACGCCC          | Primer pair specific to <i>bar</i> gene.                                       |
| bar-R                        | CTTCAGCAGGTGGGTGTAGAGCG           |                                                                                |
| 35S:pFGC-F                   | TGTGCGTCATCCCTTACGTC              | Primer pair specific to a transgene region spanning pFGC and 35SPPDK promoter. |
| 35S:pFGC-R                   | GAAGGCGGGAAACGACAATC              |                                                                                |
| MLO-02-F                     | GCCATTGTTGGTTGGTTCCAT             | Primer pair flanking the target region of <i>GmMLO02</i> ( $\approx$ 1905 bp)  |
| MLO-02-R                     | TTGTTTCGTGGAAGCAGGAGT             |                                                                                |
| MLO-19-F                     | GGGTCTCTGTTTTTGCTTTCGGC           | Primer pair flanking the target region of <i>GmMLO19</i> ( $\approx$ 1820 bp)  |
| MLO-19-R                     | AGCAGAGAAACGACATGATTCCCT          |                                                                                |
| MLO-20-F                     | TGTGTCATGCGTCTTGGATGT             | Primer pair flanking the target region of <i>GmMLO20</i> ( $\approx$ 1555 bp)  |
| MLO-20-R                     | GCATTCTGCAGCACAGAACC              |                                                                                |
| MLO-23-F                     | GTCCCATGCTTCTTCATGGTG             | Primer pair flanking the target region of <i>GmMLO23</i> ( $\approx$ 1720 bp)  |
| MLO-23-R                     | TGCTAATTGAAAGGCATTCTGC            |                                                                                |
| MLO-10-F                     | AGCATAGCCTTGTTAATTATGTTGA         | Primer pair flanking the target region of <i>GmMLO10</i> ( $\approx$ 2077 bp)  |
| MLO-10-R                     | ACTGTAACAAAAACAAAATGATGCG         |                                                                                |
| MLO-18-F                     | ACTAACTTGCCAGTGAAAACACTACAT       | Primer pair flanking the target region of <i>GmMLO18</i> ( $\approx$ 2317 bp)  |
| MLO-18-R                     | TGCTAATTGAAAGGCATTCTGC            |                                                                                |

138

139 **Table S2** Genotypes of T0 mutant lines

| Events | Gene           |                |                |                |                |                |
|--------|----------------|----------------|----------------|----------------|----------------|----------------|
|        | <i>GmMLO02</i> | <i>GmMLO10</i> | <i>GmMLO18</i> | <i>GmMLO19</i> | <i>GmMLO20</i> | <i>GmMLO23</i> |
| 3.1    | Homozygous     | WT             | WT             | Chimeric       | Chimeric       | Chimeric       |
| 15.1   | Biallelic      | WT             | WT             | Homozygous     | WT             | Chimeric       |

140

141 Notes: Homozygous: genotype that includes two identical mutant alleles; Biallelic: genotype that  
142 includes two mutant alleles; Chimeric: genotype that includes one wild-type allele and more than  
143 one mutant allele

144

145

146

147

148

149

150

151

152

153

154

155

156

157

158

159

160 **Table S3** Inheritance and segregation of transgenes at different transgenic soybean generations

| Generation | Lines  | Herbicide<br>leaf<br>painting | <i>bar</i> | 35S:pFGC  | Generation | Lines     | Herbicide<br>leaf<br>painting | <i>bar</i> | 35S:pFGC |
|------------|--------|-------------------------------|------------|-----------|------------|-----------|-------------------------------|------------|----------|
| T0         | 3.1    | R                             | +          | +         |            | 3.1-3-1   | R                             | +          | +        |
|            | 15.1   | R                             | +          | +         |            | 3.1-3-2   | R                             | +          | +        |
| T1         | 3.1-1  | R                             | +          | +         | T2         | 3.1-3-4   | R                             | +          | +        |
|            | 3.1-2  | R                             | +          | +         |            | 3.1-3-40  | R                             | +          | +        |
|            | 3.1-3  | R                             | +          | +         |            | 3.1-3-41  | S                             | -          | -        |
|            | 3.1-4  | R                             | +          | +         |            | 3.1-5-1   | S                             | -          | -        |
|            | 3.1-5  | R                             | +          | +         |            | 3.1-5-4   | R                             | +          | +        |
|            | 15.1-1 | R                             | +          | +         |            | 3.1-5-6   | R                             | +          | +        |
|            | 15.1-2 | R                             | +          | +         |            | 3.1-5-44  | S                             | -          | -        |
|            | 15.1-3 | R                             | +          | +         |            | 3.1-5-46  | S                             | -          | -        |
|            | 15.1-4 | R                             | +          | +         |            | 15.1-2-2  | R                             | +          | +        |
|            | 15.1-5 | R                             | +          | +         |            | 15.1-2-5  | R                             | +          | +        |
|            | 15.1-6 | R                             | +          | +         |            | 15.1-2-6  | R                             | +          | +        |
|            | 15.1-7 | R                             | +          | +         |            | 15.1-2-21 | R                             | +          | +        |
| 15.1-8     | R      | +                             | +          | 15.1-2-22 | R          | +         | +                             |            |          |
| 15.1-9     | R      | +                             | +          | 15.1-6-1  | R          | +         | +                             |            |          |
| 15.1-10    | R      | +                             | +          | 15.1-6-2  | R          | +         | +                             |            |          |
| 15.1-11    | R      | +                             | +          | 15.1-6-4  | R          | +         | +                             |            |          |
| 15.1-12    | R      | +                             | +          | 15.1-6-7  | R          | +         | +                             |            |          |
|            |        |                               |            |           | 15.1-6-8   | R         | +                             | +          |          |

161 Notes: R: Herbicide resistant; S: Herbicide susceptible; (+): Positive for PCR-amplification with  
162 specific primers; (-): Negative for PCR-amplification with specific primers; bar: herbicide  
163 resistance gene; 35S:pFGC:transgene region spanning pFGC vector and 35SPPDK promoter of  
164 pcoCas9
